# Supplementary material
Source: PubMed Central journal article supplement (PMC3220761)
Supplement: NIHMS323795-supplement-1_si_001.pdf [file NIHMS323795-supplement-1_si_001.pdf]

## Supporting Information for:

### Bacterial self-resistance to the natural proteasome inhibitor salinosporamide A

Andrew J. Kale<sup>1</sup>, Ryan P. McGlinchey<sup>1</sup>, Anna Lechner<sup>1</sup>, and Bradley S. Moore<sup>1,2\*</sup>

From the <sup>1</sup>Center for Marine Biotechnology and Biomedicine, Scripps Institution of Oceanography and <sup>2</sup>Skaggs School of Pharmacy and Pharmaceutical Sciences, University of California at San Diego, 9500 Gilman Drive, La Jolla, California 92093

\*To whom correspondence should be addressed.

E-Mail: [bsmoore@ucsd.edu](mailto:bsmoore@ucsd.edu)

Address: 9500 Gilman Dr., MC 0204, La Jolla, CA 92093-0204

Tel: 858-822-6650

Fax: 858-534-1305

## SUPPLEMENTAL FIGURES

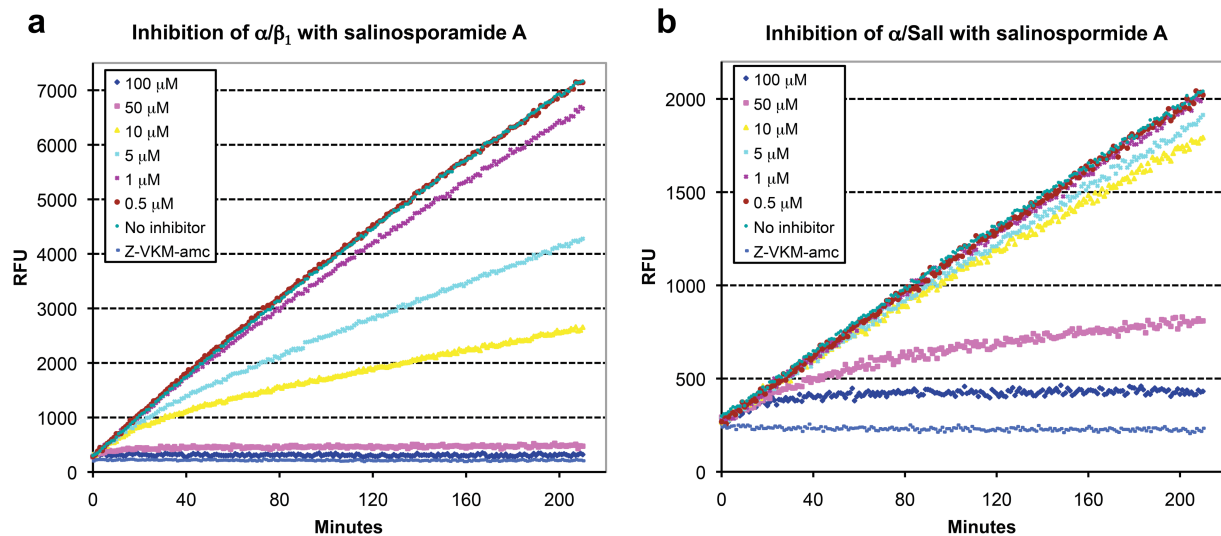

**Supplementary Figure 1.** Time-dependence of salinosporamide A inhibition on the a)  $\alpha/\beta_1$  and b)  $\alpha/Sall$  complexes. Various concentrations of salinosporamide A were premixed with fluorogenic Z-VKM-amc substrate. Proteasome complex was then added at  $20 \mu\text{g ml}^{-1}$  and substrate hydrolysis was measured once per minute. RFU = Relative fluorescence units. Salinosporamide A is spontaneously hydrolyzed in aqueous buffer with an estimated half-life of 20–30 minutes at pH 8.0 (1).



## SUPPLEMENTAL REFERENCES

1. Denora, N., Potts, B. C. M., and Stella, V. J. (2007) A mechanistic and kinetic study of the  $\beta$ -lactone hydrolysis of salinosporamide A (NPI-0052), a novel proteasome inhibitor, *J. Pharm. Sci.* 96, 2037–2047.
